# Supplementary figures and images for: Novel Bacteriophage Specific against Staphylococcus epidermidis and with Antibiofilm Activity
Source: MDPI journal article supplement (doi:10.3390/v14061340), 2022-06-20

Aligned genome fraction

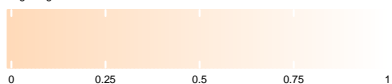

Genome length ratio

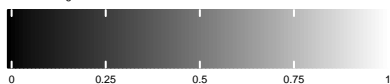

Intergenic similarity

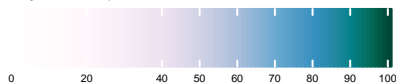

80000  
60000  
40000  
20000  
0

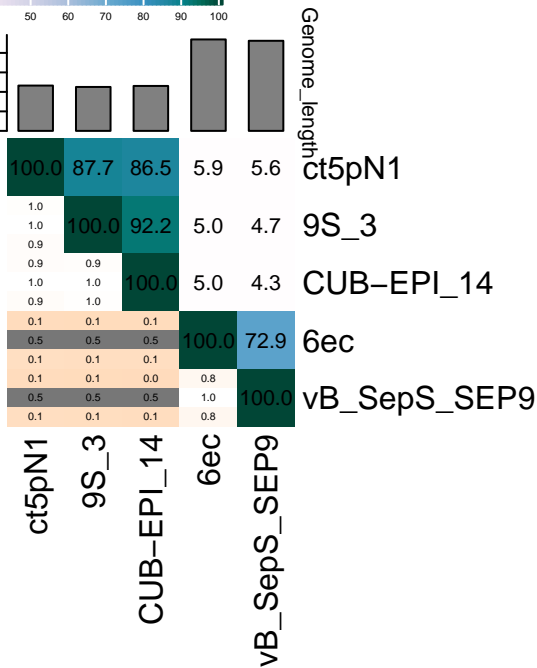

Supplement: s1 [file s1]
